# Supplementary material
Source: ML conference proceedings conference paper supplement (https://aclanthology.org/D19-1166)
Supplement: Attachment [file D19-1166.Attachment.zip]

## A Supplemental Material

Table 10 and 11 provides the statistics of grade pair distribution in the Newsela English and Newsela Spanish-English dataset.

| Src / Tgt | 2    | 3     | 4     | 5     | 6     | 7     | 8     | 9     | 10 |
|-----------|------|-------|-------|-------|-------|-------|-------|-------|----|
| 3         | 2652 | 0     | 0     | 0     | 0     | 0     | 0     | 0     | 0  |
| 4         | 4984 | 8212  | 0     | 0     | 0     | 0     | 0     | 0     | 0  |
| 5         | 2287 | 19589 | 23775 | 0     | 0     | 0     | 0     | 0     | 0  |
| 6         | 1914 | 7625  | 21022 | 21380 | 0     | 0     | 0     | 0     | 0  |
| 7         | 608  | 8897  | 14249 | 33466 | 10944 | 0     | 0     | 0     | 0  |
| 8         | 623  | 3710  | 13267 | 17347 | 22745 | 12006 | 0     | 0     | 0  |
| 9         | 130  | 5058  | 5031  | 19834 | 4684  | 30929 | 2144  | 0     | 0  |
| 10        | 6    | 40    | 224   | 320   | 382   | 289   | 400   | 142   | 0  |
| 11        | 0    | 0     | 15    | 19    | 11    | 16    | 28    | 0     | 0  |
| 12        | 1069 | 6818  | 18430 | 34232 | 28532 | 41561 | 29836 | 31327 | 97 |

Table 10: Number of text segments per grade level pair in our Newsela English Corpus

| Src / Tgt | 2   | 3    | 4    | 5    | 6    | 7    | 8    | 9    | 10 |
|-----------|-----|------|------|------|------|------|------|------|----|
| 3         | 293 | 0    | 0    | 0    | 0    | 0    | 0    | 0    | 0  |
| 4         | 670 | 1305 | 0    | 0    | 0    | 0    | 0    | 0    | 0  |
| 5         | 251 | 3383 | 1957 | 0    | 0    | 0    | 0    | 0    | 0  |
| 6         | 223 | 1124 | 2090 | 2833 | 0    | 0    | 0    | 0    | 0  |
| 7         | 60  | 1249 | 926  | 4986 | 1244 | 0    | 0    | 0    | 0  |
| 8         | 96  | 548  | 1016 | 1804 | 3705 | 1221 | 0    | 0    | 0  |
| 9         | 16  | 717  | 211  | 3074 | 189  | 6135 | 263  | 0    | 0  |
| 10        | 0   | 3    | 5    | 15   | 26   | 1    | 46   | 0    | 0  |
| 12        | 189 | 1288 | 1902 | 5312 | 4708 | 7796 | 4995 | 7077 | 30 |

Table 11: Number of text segments per grade level pair in our Newsela English-Spanish Corpus

| Model                                                                | Bleu  | SARI  | Flesch |
|----------------------------------------------------------------------|-------|-------|--------|
| <i>Results copied from <a href="#">Scarton and Specia (2018)</a></i> |       |       |        |
| seq2seq w/ side-constraint                                           | 62.91 | 41.01 | 82.91  |
| <i>Reimplementation evaluated on our Newsela download</i>            |       |       |        |
| seq2seq w/ side-constraint                                           | 58.61 | 39.81 | 70.44  |
| seq2seq w/ side-constraint + BPE                                     | 61.87 | 52.78 | 66.98  |

Table 12: Comparison with previously published results on Newsela English text simplification. Our implementation yields BLEU and SARI score that are close to those reported in [Scarton and Specia \(2018\)](#). The difference in Flesch score can be attributed to changes in the number and complexity of articles available in newsela at the time the datasets were extracted.

|    |                                                                                                                                                                                                                                                                                   |
|----|-----------------------------------------------------------------------------------------------------------------------------------------------------------------------------------------------------------------------------------------------------------------------------------|
| 12 | Se estima que 75 personas han expresado interés en alojar al menos a un solicitante de asilo, dijo Cronk. Algunas de estas personas viven en las principales áreas metropolitanas de California y Nueva York. Otros son de zonas remotas y rurales de Montana y Dakota del Norte. |
| 8  | An estimated 75 people have expressed interest in hosting at least one asylum-seeker said Cronk. Some of these people live in major California and New York area. Others are from remote and rural areas of Montana and North Dakota.                                             |
| 6  | An estimated 75 people have expressed interest in hosting at least one asylum-seeker said Cronk. Some of these people live in major California and New York area. Others are from remote and rural areas of Montana and North Dakota.                                             |
| 4  | An estimated 75 people have expressed interest in hosting at least one asylum-seeker said Cronk. Some of these people live in the <b>main</b> areas of California and New York. Others are from remote and rural areas of Montana and North Dakota.                               |
| 2  | <b>Many people live in the</b> United States and New York City. Some are from remote areas of Montana and North Dakota.                                                                                                                                                           |
| 12 | El gobierno federal realizó un contrato con el centro de detención juvenil en Vicennes, Indiana, desde el año 2004 hasta el año 2010, para que alojara a aquellos niños inmigrantes considerados como los más peligrosos.                                                         |
| 9  | The federal government conducted a contract with the youth detention center at Vicennes, Indiana, since 2004 to 2010 to host those immigrant children considered as the most dangerous ones.                                                                                      |
| 7  | The federal government conducted a contract with the youth detention center at Vicennes, Indiana, since 2004 to 2010, <b>so that they hosted</b> those immigrant children considered as the most dangerous ones.                                                                  |
| 5  | The federal government <b>made</b> a contract with the youth detention center in Vice-Year. <b>It is in the</b> United States since 2004 to 2010.                                                                                                                                 |
| 3  | The government made a deal with the youth detention center in Vice-Year. It is in the United States since 2004 to 2010. <b>It was to host</b> those immigrant children as the most dangerous in 2010.                                                                             |
| 12 | Poco después de que el dron despegó durante la prueba de Verizon en Cape May, una "aeronave de seguimiento" salió tras él, para garantizar que el dron pudiera evadir otros aviones en caso de volar dentro de un espacio aéreo designado.                                        |
| 9  | Shortly after the drone took off from Verizon in Cape May, a "unmanned aircraft following" came out after him, to ensure that the drone could evade other planes in case of flying inside a designated airspace.                                                                  |
| 6  | Shortly after the drone took off in Cape May, a "unmanned aircraft force" came out <b>behind</b> him. <b>They could</b> ensure that the drone could evade other planes in case of flying inside a designated airspace.                                                            |
| 2  | <b>Not long</b> after the drone took off from Verizon in Cape May, a "unmanned aircraft help" came out after him. <b>It is to make sure</b> the drone could evade other planes in case of flying inside a air space.                                                              |

Table 13: Examples of simplification operations observed when simplifying from a higher Grade level into different lower grade levels.

| Src_G | Tgt_G | Source                                                                                                                                                                                                                      | Target                                                                                                                                                                                                 | Predicted                                                                                                                                                                    |
|-------|-------|-----------------------------------------------------------------------------------------------------------------------------------------------------------------------------------------------------------------------------|--------------------------------------------------------------------------------------------------------------------------------------------------------------------------------------------------------|------------------------------------------------------------------------------------------------------------------------------------------------------------------------------|
| 8     | 5     | Los partidarios de la reserva dicen que marca un precedente para muchos países que trabajan conjuntamente para proteger una gran porción del océano que no se halla dentro de la jurisdicción específica de ningún país.    | Supporters of the reserve say it sets an example for multiple countries working together to protect a large area of ocean. The area is not controlled by any single nation.                            | Supporters of the reserve say that marks a precedent for many countries that work together to protect a large portion of the ocean.                                          |
| 5     | 3     | Los padres no respondieron bien al escuchar que sus hijas estaban surfando porque les preocupaba el peligro y la reputación de las niñas.                                                                                   | The parents did not react well to their daughters surfing. They worried about the danger and what other people would think.                                                                            | Parents did not want to hear that their daughters were surfing their daughters because they were worried about the danger and their reputation.                              |
| 12    | 5     | Según dijo el actor Eds Eramiha, esta escena habría sido difícil de imaginar hace tan solo dos décadas, cuando el idioma te reo maorí era ampliamente considerado una lengua moribunda que no valía la pena enseñar.        | Eds Eramiha is an actor in the play. He says it would have been difficult to imagine this scene just 20 years ago. Back then, te reo Maori was widely regarded as a dying language not worth teaching. | Actress Eds Eramiha said this scene would have been hard to imagine only two decades ago. The language was widely viewed as a dying tongue that would not be worth teaching. |
| 5     | 4     | Dos astrónomos han planteado una fascinante pregunta: ¿Pueden las lunas tener lunas? La interesante respuesta es que sí, una luna puede tener su propia luna.                                                               | Two astronomers asked a question: Can moons have moons? The interesting answer is yes, a moon can have its own moon.                                                                                   | Two astronomers have asked a fascinating question: Can Mondays have Monday? The interesting answer is that yes, a moon can have its own.                                     |
| 9     | 3     | Como hijo de un sastre y modisto de pocos ingresos, consiguió trabajo en el taller de un sastre en Brooklyn a la edad de 15 años, terminó su secundaria estudiando por las noches y luego se dispuso a triunfar en la vida. | Campos is the son of a tailor and a poor dressmaker. He found work in a Brooklyn clothing shop at age 15 and He finished high school at night. Then he set out to succeed.                             | The son of a saga and a modest age of a few incomes, he got work at the age of 15 years old. He graduated from the evenings and then turned into life in life.               |

Table 14: Example translations produced by our best multitask model. Refer Table 7 (Row 1).
